# Supplementary material
Source: publisher figshare collection journal article supplement (https://tandf.figshare.com/ndownloader/files/17811587)
Supplement: Supplementary file 1 [file 17811587]

**Supplementary Information**

**Dissolved organic matter and inorganic N jointly regulate greenhouse gases fluxes from forest soils with different moistures during a freeze-thaw period**

Haohao Wua,b, Xingkai Xua,b,*,Weiguo Chengc and Lin Hand

a State Key Laboratory of Atmospheric Boundary Layer Physics and Atmospheric Chemistry, Institute of Atmospheric Physics, Chinese Academy of Sciences, Beijing 100029, China

b Department of Atmospheric Chemistry and Environmental Science, College of Earth and Planetary Sciences, University of Chinese Academy of Sciences, Beijing 100049, China

c Faculty of Agriculture, Yamagata University, Tsuruoka 997-8555, Japan

d College of Atmospheric Sciences, Chengdu University of Information Technology, Chengdu 610225, China

Corresponding Author:* Tel: +86-10-82085510; Fax: +86-10-62041393;

email: [xingkai_xu@mail.iap.ac.cn](mailto:xingkai_xu@mail.iap.ac.cn)

The supplementary information has three pages including one table and one figure.

**Table S1.** Correlation coefficients among cumulative soil GHG emissions and soil properties during the freeze-thaw period.

|  | N2O | CO2 | CH4 | pH | DOC | DON | NO3—N | NH4+-N | MBC | MBN | MBC:MBN | N_min | FDOM | BG | NAG | BG:NAG |
| --- | --- | --- | --- | --- | --- | --- | --- | --- | --- | --- | --- | --- | --- | --- | --- | --- |
| N2O | 1 |  |  |  |  |  |  |  |  |  |  |  |  |  |  |  |
| CO2 | 0.29* | 1 |  |  |  |  |  |  |  |  |  |  |  |  |  |  |
| CH4 | 0.22 | -0.67** | 1 |  |  |  |  |  |  |  |  |  |  |  |  |  |
| pH | 0.49** | 0.04 | 0.36** | 1 |  |  |  |  |  |  |  |  |  |  |  |  |
| DOC | 0.39** | 0.31* | 0.02 | 0.18 | 1 |  |  |  |  |  |  |  |  |  |  |  |
| DON | 0.35* | 0.41** | -0.09 | 0.26 | 0.95** | 1 |  |  |  |  |  |  |  |  |  |  |
| NO3--N | -0.42** | 0.39** | -0.56** | -0.76** | 0.12 | 0.10 | 1 |  |  |  |  |  |  |  |  |  |
| NH4+-N | 0.33* | 0.32* | 0.29* | 0.69** | 0.18 | 0.25 | -0.40** | 1 |  |  |  |  |  |  |  |  |
| MBC | 0.24 | 0.69** | -0.52** | 0.11 | 0.54** | 0.62** | 0.26 | 0.28* | 1 |  |  |  |  |  |  |  |
| MBN | 0.16 | 0.70** | -0.58** | 0.13 | 0.48** | 0.59** | 0.28* | 0.19 | 0.93** | 1 |  |  |  |  |  |  |
| MBC:MBN | -0.11 | -0.68** | 0.60** | -0.15 | -0.17 | -0.29* | -0.21 | -0.07 | -0.68** | -0.83** | 1 |  |  |  |  |  |
| N_min | -0.37** | 0.57** | -0.59** | -0.49** | 0.17 | 0.22 | 0.90** | -0.02 | 0.40** | 0.43** | -0.34* | 1 |  |  |  |  |
| FDOM | 0.28* | 0.70** | -0.52** | 0.07 | 0.69** | 0.73** | 0.31* | 0.16 | 0.87** | 0.86** | -0.70** | 0.42** | 1 |  |  |  |
| BG | 0.42** | 0.57** | -0.13 | 0.47** | 0.39** | 0.50** | -0.10 | 0.41** | 0.52** | 0.56** | -0.54** | 0.13 | 0.57** | 1 |  |  |
| NAG | 0.50** | 0.51** | -0.14 | 0.39** | 0.47** | 0.51** | -0.14 | 0.40** | 0.67** | 0.62** | -0.56** | 0.01 | 0.62** | 0.48** | 1 |  |
| BG:NAG | 0.02 | 0.03 | 0.01 | 0.16 | -0.02 | 0.05 | -0.01 | 0.08 | -0.07 | 0.01 | -0.01 | 0.11 | -0.02 | 0.59** | -0.38** | 1 |

N2O, CO2 and CH4 represent cumulative N2O, CO2 and CH4 fluxes, respectively. N_min represents net N mineralization. FDOM represents the contribution of fulvic-like components in soil DOM. *, *P*<0.05; **, *P*<0.01.

**Figure S1.** Relationships between cumulative GHG emissions and the concentrations of DOC, the contribution of fulvic-like DOM, and net N mineralization in forest soils during the freeze-thaw period. The dots circled by dashed line were excluded from linear regressions. The unit of cumulative N2O emission is mg N2O-N m-2.
